# Supplementary material
Source: PubMed Central journal article supplement (PMC6601629)
Supplement: NIHMS1035471-supplement-Supplementary_Figure_1.pdf [file NIHMS1035471-supplement-Supplementary_Figure_1.pdf]

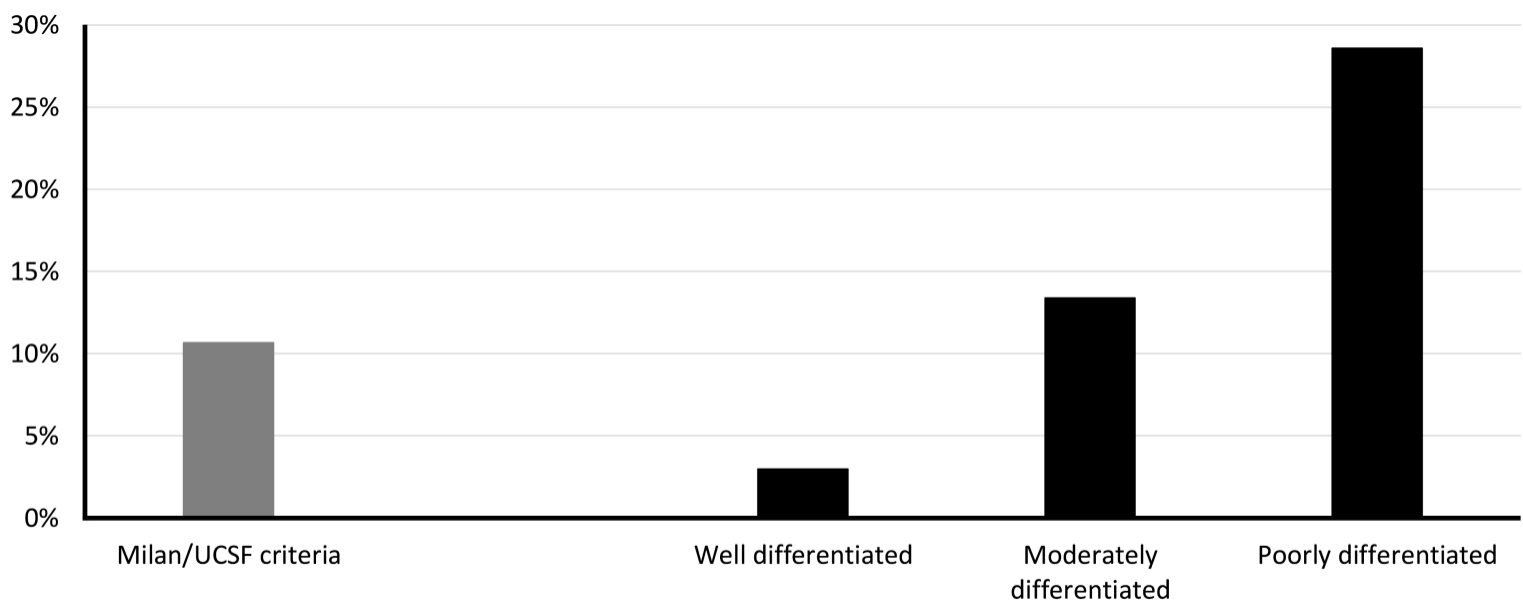

**Supplementary Figure 1: Comparison of HCC recurrence rates by histologic grade and radiographic criteria.** Classification of tumor grade using WHO methodology better stratifies post-transplant HCC recurrence than Milan or UCSF imaging criteria (n=178, p=0.0082).
