# Supplementary material
Source: PubMed Central journal article supplement (PMC6601629)
Supplement: NIHMS1035471-supplement-Supplementary_Figure_2.pdf [file NIHMS1035471-supplement-Supplementary_Figure_2.pdf]

| Case             | WHO Grade |          |          | RRAS Category    |          |          |
|------------------|-----------|----------|----------|------------------|----------|----------|
|                  | Grader 1  | Grader 2 | Grader 3 | Grader 1         | Grader 2 | Grader 3 |
| 1                | M         | P        | M        | L                | L        | I        |
| 2                | M         | P        | M        | I                | I        | I        |
| 3                | P         | P        | P        | H                | H        | H        |
| 4                | M         | P        | P        | I                | H        | H        |
| 5                | M         | P        | W        | L                | L        | L        |
| 6                | M         | P        | M        | I                | I        | L        |
| 7                | M         | P        | P        | I                | I        | H        |
| 8                | M         | P        | P        | H                | H        | I        |
| 9                | M         | P        | P        | I                | H        | I        |
| 10               | M         | P        | M        | I                | I        | I        |
| 11               | M         | P        | P        | I                | I        | I        |
| 12               | M         | M        | M        | I                | L        | I        |
| 13               | W         | P        | W        | L                | L        | L        |
| 14               | M         | P        | P        | I                | I        | I        |
| 15               | M         | W        | M        | I                | L        | L        |
| 16               | M         | P        | W        | I                | I        | L        |
| 17               | M         | P        | P        | H                | H        | I        |
| 18               | M         | P        | M        | I                | I        | I        |
| 19               | W         | P        | M        | L                | L        | I        |
| 20               | M         | P        | M        | I                | H        | I        |
| <b>K = 0.136</b> |           |          |          | <b>K = 0.543</b> |          |          |

**Supplementary Figure 2: Assessment of interobserver agreement.** RRAS categorization offers improved agreement between three pathologists, compared to WHO grade. 20 challenging tumors were evaluated using WHO methodology (weighted kappa=0.136; **W**=well-differentiated, **M**=moderately differentiated, and **P**=poorly differentiated) and RRAS criteria (weighted kappa=0.543; **L**=low risk, **I**=intermediate risk, and **H**=high risk). Cases shaded green indicate agreement among all graders, yellow indicates agreement among 2 of 3 graders, and red indicates no agreement among any of the graders.
