# Supplementary material
Source: PubMed Central journal article supplement (PMC6601629)
Supplement: NIHMS1035471-supplement-Supplementary_Figure_3.pdf [file NIHMS1035471-supplement-Supplementary_Figure_3.pdf]

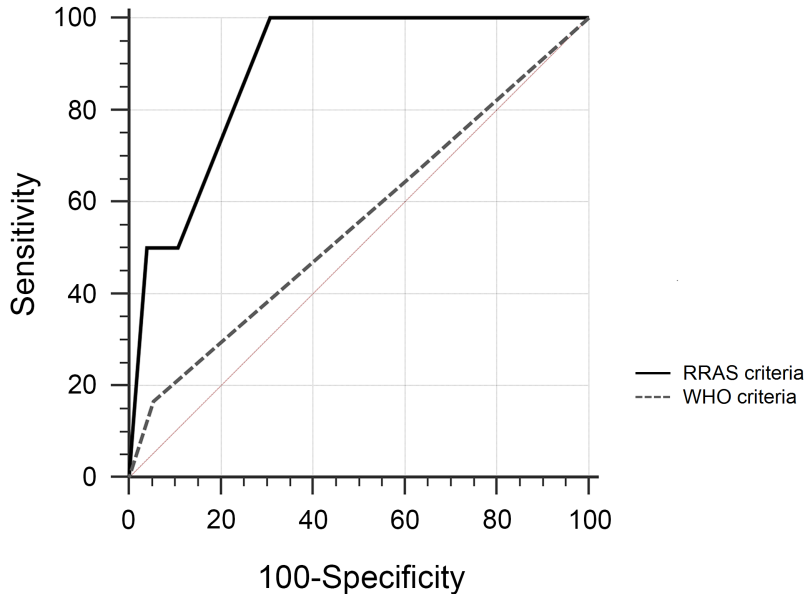

**Supplementary Figure 3: Validation of RRAS performance in independent cohort.** In 81 explants that were not used to establish the scoring criteria, ROC curve analysis was used to validate the diagnostic performance of the RRAS in predicting post-transplant HCC recurrence when compared to WHO tumor grade (WHO criteria (dashed line, AUC=0.554), RRAS criteria (solid line, AUC=0.887), n=81). In this independent cohort, RRAS allowed for a more accurate prediction of tumor recurrence following transplantation ( $p=0.020$ ).
