# Supplementary material
Source: PubMed Central journal article supplement (PMC6601629)
Supplement: NIHMS1035471-supplement-Supplementary_Figure_4.pdf [file NIHMS1035471-supplement-Supplementary_Figure_4.pdf]

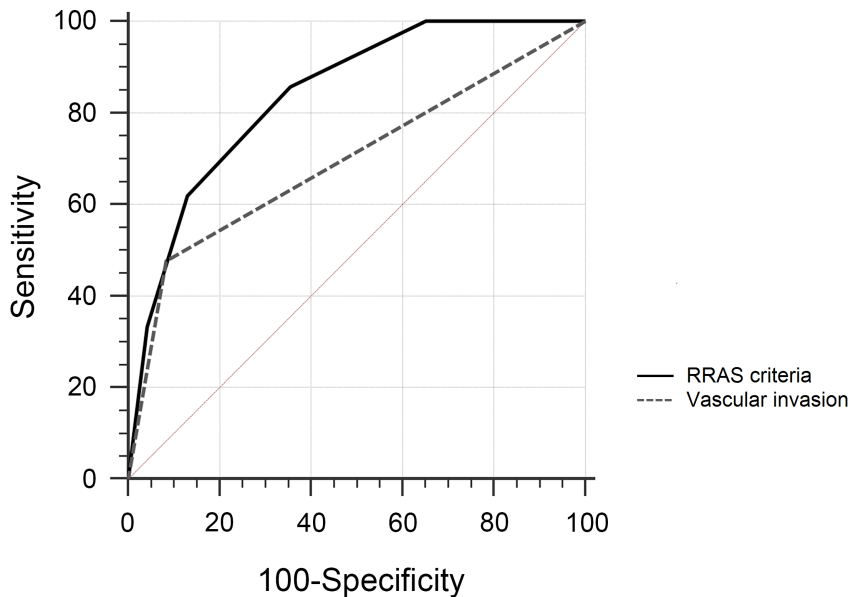

**Supplementary Figure 4: Comparison of recurrence prediction by vascular invasion and RRAS.** Post-transplant recurrence prediction using vascular invasion status and RRAS criteria was assessed by ROC curve analysis (vascular invasion (dashed line, AUC=0.697), RRAS criteria (solid line, AUC=0.839),  $n=190$ ). RRAS more accurately predicts tumor recurrence following transplantation than vascular invasion status alone ( $p=0.017$ ).
